# Supplementary material
Source: PubMed Central journal article supplement (PMC2695122)
Supplement: 0901100106_ST1_PDF.pdf [file 0901100106_ST1_PDF.pdf]

*SUPPORTING Table 1*

**The chemodiversity of wines can reveal a metabo-geography  
expression of cooperage oak wood**

Régis D. Gougeon<sup>1\*</sup>, Marianna Lucio<sup>2\*</sup>, Moritz Frommberger<sup>2</sup>, Dominique Peyron<sup>3</sup>, David Chassagne<sup>1</sup>, Hervé Alexandre<sup>4</sup>, François Feuillat<sup>5</sup>, Philippe Cayot<sup>6</sup>, Andrée Voilley<sup>6</sup>, Istvan Gebefügi<sup>2</sup>, Norbert Hertkorn<sup>2</sup> & Philippe Schmitt-Kopplin<sup>2\*</sup>

\*To whom correspondence should be addressed. Email: [regis.gougeon@u-bourgogne.fr](mailto:regis.gougeon@u-bourgogne.fr);  
[schmitt-kopplin@helmholtz-muenchen.de](mailto:schmitt-kopplin@helmholtz-muenchen.de)

**Supporting Table 1.** Compilation of possible metabolites identified in the *Vitis vinifera* organism from the MassTrix database that can be associated with the exact masses and the corresponding formulas obtained from mass spectra. These masses, which correspond to PLS-DA score plots of Figure 2 discriminate red wines (a) from white wines (b); Chardonnay wines from Beaune (c) from Pinot noir wines from Mercurey (d) Syrah wines from Côte-Rotie (e) and Grenache wines from Gigondas (f); White wines aged in sessile oak (g) from white wines aged in pedunculate oak (h); Red wines aged in sessile oak (i) from red wines aged in pedunculate oak (j); Wines aged in barrels made of oaks from the forest of Darney (k) Citeaux (l) Tronçais (m) Bitche (n) Bertrange (o) Jupilles (p) Saint-Palais (q) Sud-Ouest (r) and Limousin (s) regardless of the oak species.

## (a) red wines

| mass            | formula                                                        | name                                                  |
|-----------------|----------------------------------------------------------------|-------------------------------------------------------|
| 166.02660867066 | C <sub>8</sub> H <sub>6</sub> O <sub>4</sub>                   | 4-Formylsalicylic acid                                |
|                 |                                                                | 4-Hydroxyphenylglyoxylate                             |
|                 |                                                                | Phthalate                                             |
|                 |                                                                | Terephthalate                                         |
|                 |                                                                | 3-Formylsalicylic acid                                |
| 205.03750770751 | C <sub>10</sub> H <sub>7</sub> NO <sub>4</sub>                 | Xanthurenic acid                                      |
|                 |                                                                | 6-Hydroxykynurenate                                   |
| 218.05790879894 | C <sub>12</sub> H <sub>10</sub> O <sub>4</sub>                 | 2,2',3-Trihydroxydiphenylether                        |
| 219.07428713905 | C <sub>8</sub> H <sub>13</sub> NO <sub>6</sub>                 | O-Succinyl-L-homoserine                               |
| 222.06742793578 | C <sub>7</sub> H <sub>14</sub> N <sub>2</sub> O <sub>4</sub> S | L-Cystathionine                                       |
|                 |                                                                | Cystathionine                                         |
| 240.0633881022  | C <sub>11</sub> H <sub>12</sub> O <sub>6</sub>                 | 2-Succinyl-6-hydroxy-2,4-cyclohexadiene-1-carboxylate |
| 244.07355886308 | C <sub>14</sub> H <sub>12</sub> O <sub>4</sub>                 | 3,3',4',5-Tetrahydroxystilbene (piceatannol)          |
| 258.08920892722 | C <sub>15</sub> H <sub>14</sub> O <sub>4</sub>                 | Naphthyl-2-methyl-succinic acid                       |
|                 |                                                                | 2,2-Bis(4-hydroxyphenyl)-propanoic acid               |
| 266.15180918378 | C <sub>15</sub> H <sub>22</sub> O <sub>4</sub>                 | Xanthoxic acid                                        |
| 272.06847348264 | C <sub>15</sub> H <sub>12</sub> O <sub>5</sub>                 | Isosalipurpol                                         |
|                 |                                                                | Pinobanksin                                           |
|                 |                                                                | Butein                                                |
|                 |                                                                | Garbanzol                                             |
|                 |                                                                | Butin                                                 |
|                 |                                                                | Naringenin                                            |
| 274.08412354678 | C <sub>15</sub> H <sub>14</sub> O <sub>5</sub>                 | Afzelechin                                            |
|                 |                                                                | Apiforol                                              |
|                 |                                                                | (-)-Epiafzelechin                                     |
| 280.1310737392  | C <sub>15</sub> H <sub>20</sub> O <sub>5</sub>                 | Phaseic acid                                          |
|                 |                                                                | 8'-Hydroxyabscisate                                   |
| 284.12629908875 | C <sub>10</sub> H <sub>22</sub> NO <sub>6</sub> PR             | 1-(1-Alkenyl)-sn-glycero-3-phosphocholine             |
| 288.0633881022  | C <sub>15</sub> H <sub>12</sub> O <sub>6</sub>                 | Fustin                                                |
|                 |                                                                | Dihydrokaempferol                                     |
|                 |                                                                | 2',3,4,4',6'-Pentahydroxychalcone                     |
|                 |                                                                | Eriodictyol                                           |
| 290.07903816634 | C <sub>15</sub> H <sub>14</sub> O <sub>6</sub>                 | Luteoforol                                            |
|                 |                                                                | (-)-Epicatechin                                       |
|                 |                                                                | cis-3,4-Leucopelargonidin                             |
|                 |                                                                | Fisetinidol-4beta-ol                                  |
|                 |                                                                | (+)-Catechin                                          |
| 290.12263431374 | C <sub>10</sub> H <sub>18</sub> N <sub>4</sub> O <sub>6</sub>  | N-(L-Arginino)succinate                               |
| 302.04265265762 | C <sub>15</sub> H <sub>10</sub> O <sub>7</sub>                 | Tricetin                                              |
|                 |                                                                | Quercetin                                             |
| 306.0739527859  | C <sub>15</sub> H <sub>14</sub> O <sub>7</sub>                 | (+)-Gallocatechin                                     |
|                 |                                                                | Leucocyanidin                                         |
|                 |                                                                | (-)-Epigallocatechin                                  |

|                 |            |                                                       |
|-----------------|------------|-------------------------------------------------------|
| 316.05830272176 | C16H12O7   | 3',4',5,7-Tetrahydroxy-3-methoxyflavone               |
| 318.03756727718 | C15H10O8   | Myricetin                                             |
| 320.05321734132 | C15H12O8   | Dihydromyricetin                                      |
| 320.08960285004 | C16H16O7   | 4-Coumaroylshikimate                                  |
| 326.10016753374 | C15H18O8   | cis-beta-D-Glucosyl-2-hydroxycinnamate                |
|                 |            | trans-beta-D-Glucosyl-2-hydroxycinnamate              |
| 332.05321734132 | C16H12O8   | Laricitrin                                            |
| 338.10016753374 | C16H18O8   | p-Coumaroyl quinic acid                               |
| 344.08960285004 | C18H16O7   | 3',5-Dihydroxy-3,4',7-trimethoxyflavone               |
| 344.13186158484 | C12H24O11  | Melibiitol                                            |
| 346.06886740546 | C17H14O8   | Syringetin                                            |
| 352.06417594784 | C12H16O12  | 4-(4-Deoxy-alpha-D-gluc-4-enuronosyl)-D-galacturonate |
| 356.11073221744 | C16H20O9   | Scopolin                                              |
| 360.0845174696  | C18H16O8   | Rosmarinate                                           |
| 422.08254204045 | C12H23O14P | Maltose 6'-phosphate                                  |
|                 |            | Lactose 6-phosphate                                   |
|                 |            | alpha,alpha'-Trehalose 6-phosphate                    |
|                 |            | Sucrose 6-phosphate                                   |
| 448.10056145656 | C21H20O11  | Luteolin 7-O-beta-D-glucoside                         |
|                 |            | Kaempferol 3-O-glucoside                              |
|                 |            | Kaempferol 3-O-beta-D-galactoside                     |
| 464.09547607612 | C21H20O12  | Quercetin 3-O-glucoside                               |
| 580.17920570008 | C27H32O14  | Naringin                                              |

(b) white wines

| mass            | formula  | name                               |
|-----------------|----------|------------------------------------|
| 160.07355886308 | C7H12O4  | 6-Carboxyhexanoate                 |
| 161.08406397711 | C10H11NO | Indole-3-ethanol                   |
| 165.04259308795 | C8H7NO3  | 5-Pyridoxolactone                  |
|                 |          | Formylanthranilate                 |
|                 |          | 4-Pyridoxolactone                  |
| 165.99359428922 | C4H6O5S  | Thiodiacetic acid sulfoxide        |
| 167.05824315209 | C8H9NO3  | Isopyridoxal                       |
|                 |          | 3-Methoxyanthranilate              |
|                 |          | Pyridoxal                          |
| 173.01466408695 | C6H7NO3S | 2-Aminobenzenesulfonate            |
| 179.05824315209 | C9H9NO3  | Hippurate                          |
| 180.04562986208 | C6H12O4S | 5-Methylthio-D-ribose              |
| 180.07864424352 | C10H12O3 | Coniferyl alcohol                  |
| 190.04773803806 | C7H10O6  | 3-Dehydroquinate                   |
|                 |          | 4-Hydroxy-2-oxo-heptanedioate      |
|                 |          | 2,4-Dihydroxyhept-2-enedioate      |
| 204.0422587348  | C11H8O4  | 1,2-Dihydroxy-8-carboxynaphthalene |
|                 |          | Spirodilactone                     |
|                 |          | 1,4-Dihydroxy-2-naphthoate         |

|                 |               |                                                      |
|-----------------|---------------|------------------------------------------------------|
| 207.05315777165 | C10H9NO4      | 4-(2-Aminophenyl)-2,4-dioxobutanoate                 |
|                 |               | 2-Formaminobenzoylacetate                            |
|                 |               | 1-Nitro-5,6-dihydroxy-dihydronaphthalene             |
| 207.05652889893 | C7H13NO4S     | S-(2-Hydroxyethyl)-N-acetyl-L-cysteine               |
| 214.04773803806 | C9H10O6       | 2-Hydroxy-6-oxonona-2,4-diene-1,9-dioate             |
| 217.05863707491 | C8H11NO6      | 2-(Hydroxymethyl)-3-(acetamidomethylene)succinate... |
| 278.12665706506 | C14H18N2O4    | alpha-Ribazole                                       |
| 300.03823598348 | C14H8N2O6     | Cinnavalinate                                        |
| 325.13140809235 | C19H19NO4     | (S)-Cheilanthifoline                                 |
| 334.05660207609 | C11H15N2O8P   | Nicotinamide D-ribonucleotide                        |
| 335.07872089545 | C11H17N3O7S   | S-Formylglutathione                                  |
| 481.98926311559 | C10H17N2O14P3 | dTTP                                                 |

(c) Chardonnay/Beaune

| mass            | formula    | name                                                 |
|-----------------|------------|------------------------------------------------------|
| 160.07355886308 | C7H12O4    | 6-Carboxyhexanoate                                   |
| 161.08406397711 | C10H11NO   | Indole-3-ethanol                                     |
| 165.04259308795 | C8H7NO3    | 5-Pyridoxolactone                                    |
|                 |            | Formylanthranilate                                   |
|                 |            | 4-Pyridoxolactone                                    |
| 165.99359428922 | C4H6O5S    | Thiodiacetic acid sulfoxide                          |
| 167.05824315209 | C8H9NO3    | Isopyridoxal                                         |
|                 |            | 3-Methoxyanthranilate                                |
|                 |            | Pyridoxal                                            |
| 173.01466408695 | C6H7NO3S   | 2-Aminobenzenesulfonate                              |
| 179.05824315209 | C9H9NO3    | Hippurate                                            |
| 180.04562986208 | C6H12O4S   | 5-Methylthio-D-ribose                                |
| 180.07864424352 | C10H12O3   | Coniferyl alcohol                                    |
| 190.04773803806 | C7H10O6    | 3-Dehydroquinone                                     |
|                 |            | 4-Hydroxy-2-oxo-heptanedioate                        |
|                 |            | 2,4-Dihydroxyhept-2-enedioate                        |
| 197.06880783579 | C9H11NO4   | 3,4-Dihydroxy-L-phenylalanine                        |
|                 |            | N-Hydroxy-L-tyrosine                                 |
| 204.0422587348  | C11H8O4    | 1,2-Dihydroxy-8-carboxynaphthalene                   |
|                 |            | Spirodilactone                                       |
|                 |            | 1,4-Dihydroxy-2-naphthoate                           |
| 207.05315777165 | C10H9NO4   | 4-(2-Aminophenyl)-2,4-dioxobutanoate                 |
|                 |            | 2-Formaminobenzoylacetate                            |
|                 |            | 1-Nitro-5,6-dihydroxy-dihydronaphthalene             |
| 207.05652889893 | C7H13NO4S  | S-(2-Hydroxyethyl)-N-acetyl-L-cysteine               |
| 214.04773803806 | C9H10O6    | 2-Hydroxy-6-oxonona-2,4-diene-1,9-dioate             |
| 217.05863707491 | C8H11NO6   | 2-(Hydroxymethyl)-3-(acetamidomethylene)succinate... |
| 278.12665706506 | C14H18N2O4 | alpha-Ribazole                                       |
| 300.03823598348 | C14H8N2O6  | Cinnavalinate                                        |

|                 |               |                               |
|-----------------|---------------|-------------------------------|
| 325.13140809235 | C19H19NO4     | (S)-Cheilanthifoline          |
| 334.05660207609 | C11H15N2O8P   | Nicotinamide D-ribonucleotide |
| 335.07872089545 | C11H17N3O7S   | S-Formylglutathione           |
| 481.98926311559 | C10H17N2O14P3 | dTTP                          |

(d) Pinot noir/Mercurey

| mass            | formula        | name                                                                                                      |
|-----------------|----------------|-----------------------------------------------------------------------------------------------------------|
| 160.08479225308 | C6H12N2O3      | N-gamma-Acetyldiaminobutyrate<br>D-Alanyl-D-alanine                                                       |
| 168.02834000608 | C5H4N4O3       | Urate                                                                                                     |
| 168.08987763352 | C8H12N2O2      | Pyridoxamine                                                                                              |
| 190.01135252934 | C6H6O7         | Oxalosuccinate                                                                                            |
| 190.06299417938 | C11H10O3       | 1,2-Dihydroxy-7-hydroxymethylnaphthalene                                                                  |
| 190.09535693678 | C7H14N2O4      | LL-2,6-Diaminoheptanedioate<br>meso-2,6-Diaminoheptanedioate                                              |
| 191.05824315209 | C10H9NO3       | 5-Hydroxyindoleacetate                                                                                    |
| 199.09569128993 | C8H13N3O3      | gamma-Glutamyl-beta-aminopropionitrile                                                                    |
| 204.08987763352 | C11H12N2O2     | L-Tryptophan<br>Tryptophan                                                                                |
| 205.03750770751 | C10H7NO4       | Xanthurenic acid<br>6-Hydroxykynurenate                                                                   |
| 218.10552769766 | C12H14N2O2     | N-Acetylserotonin                                                                                         |
| 220.08479225308 | C11H12N2O3     | 5-Hydroxy-L-tryptophan                                                                                    |
| 222.06742793578 | C7H14N2O4S     | L-Cystathionine<br>Cystathionine                                                                          |
| 232.1211777618  | C13H16N2O2     | Melatonin                                                                                                 |
| 240.0633881022  | C11H12O6       | 2-Succinyl-6-hydroxy-2,4-cyclohexadiene-1-carboxylate                                                     |
| 245.14878949191 | C9H19N5O3      | beta-Alanyl-L-arginine                                                                                    |
| 248.11609238136 | C13H16N2O3     | 6-Hydroxymelatonin                                                                                        |
| 250.15689456422 | C15H22O3       | Xanthoxin<br>Abscisic alcohol                                                                             |
| 260.10485899136 | C15H16O4       | 2,3-Bis(4-hydroxyphenyl)-1,2-propanediol                                                                  |
| 266.15180918378 | C15H22O4       | Xanthoxic acid                                                                                            |
| 281.08993720319 | C13H15NO6      | 4-Hydroxyphenylacetylglutamine                                                                            |
| 284.12629908875 | C10H22NO6PR    | 1-(1-Alkenyl)-sn-glycero-3-phosphocholine                                                                 |
| 305.16270822063 | C17H23NO4      | (6S)-Hydroxyhyoscyamine                                                                                   |
| 344.13186158484 | C12H24O11      | Melibiitol                                                                                                |
| 354.0950821533  | C16H18O9       | Chlorogenate                                                                                              |
| 360.0845174696  | C18H16O8       | Rosmarinate                                                                                               |
| 422.08254204045 | C12H23O14P     | alpha, alpha'-Trehalose 6-phosphate<br>Maltose 6'-phosphate<br>Lactose 6-phosphate<br>Sucrose 6-phosphate |
| 614.14726755525 | C20H31N4O16P   | CMP-N-acetylneuraminat                                                                                    |
| 838.15232277163 | C24H41N8O17P3S | beta-Alanyl-CoA                                                                                           |

## (e) Syrah/Côte Rotie

| mass            | formula     | name                                                   |
|-----------------|-------------|--------------------------------------------------------|
| 156.0422587348  | C7H8O4      | 2-Hydroxy-6-keto-2,4-heptadienoate                     |
|                 |             | 2-Hydroxy-5-methyl-cis,cis-muconic semialdehyde        |
|                 |             | 1,6-Dihydroxy-cis-2,4-cyclohexadiene-1-carboxylic acid |
|                 |             | 4-Carboxymethyl-4-methylbut-2-en-1,4-olide             |
|                 |             | 3-Methyl-cis,cis-hexadienedioate                       |
| 159.06841391297 | C10H9NO     | Indole-3-acetaldehyde                                  |
|                 |             | N-Hydroxy-1-aminonaphthalene                           |
| 180.0534921248  | C8H8N2O3    | Nicotinurate                                           |
| 219.05315777165 | C11H9NO4    | 5-Hydroxyindolepyruvate                                |
|                 |             | 8-Methoxykynurenate                                    |
| 219.11067264777 | C9H17NO5    | Pantothenate                                           |
| 242.05790879894 | C14H10O4    | cis-4-(1'-Hydroxynaphth-2'-yl)-2-oxobut-3-enoate       |
|                 |             | 2-Hydroxy-2H-benzo[h]chromene-2-carboxylate            |
| 250.06234255534 | C8H14N2O5S  | gamma-L-Glutamyl-L-cysteine                            |
| 262.04536868609 | C6H15O9P    | Galactitol 1-phosphate                                 |
|                 |             | Sorbitol 6-phosphate                                   |
|                 |             | D-Mannitol 1-phosphate                                 |
| 267.09675391905 | C10H13N5O4  | Deoxyguanosine                                         |
|                 |             | Adenosine                                              |
| 274.00898317737 | C6H11O10P   | 6-Phospho-2-dehydro-D-gluconate                        |
|                 |             | 1-Phospho-alpha-D-galacturonate                        |
|                 |             | D-Glucuronate 1-phosphate                              |
| 274.12771969418 | C10H18N4O5  | N2-Succinyl-L-arginine                                 |
| 307.08380627589 | C10H17N3O6S | Glutathione                                            |
| 309.985484458   | C5H12O11P2  | D-Ribose 1,5-bisphosphate                              |
|                 |             | D-Ribulose 1,5-bisphosphate                            |
| 318.03756727718 | C15H10O8    | Myricetin                                              |
| 322.06886740546 | C15H14O8    | Leucodelphinidin                                       |
| 338.05151669565 | C10H15N2O9P | 1-(5-Phosphoribosyl)imidazole-4-acetate                |
| 338.10016753374 | C16H18O8    | p-Coumaroyl quinic acid                                |
| 362.17293855118 | C20H26O6    | Gibberellin A19                                        |
|                 |             | Gibberellin A36                                        |
| 370.07474063154 | C12H18O13   | Digalacturonate                                        |
| 464.09547607612 | C21H20O12   | Quercetin 3-O-glucoside                                |

## (f) Grenache/Gigondas

| mass           | formula | name       |
|----------------|---------|------------|
| 150.0528234185 | C5H10O5 | L-Ribulose |
|                |         | D-Lyxose   |
|                |         | D-Xylose   |

|                 |            |                                                       |
|-----------------|------------|-------------------------------------------------------|
|                 |            | L-Lyxose                                              |
|                 |            | L-Xylulose                                            |
|                 |            | D-Ribose                                              |
|                 |            | D-Ribulose                                            |
|                 |            | D-Xylulose                                            |
|                 |            | L-Arabinose                                           |
| 158.02152329022 | C6H6O5     | 2-Maleylacetate                                       |
|                 |            | 3-Hydroxy-cis,cis-muconate                            |
|                 |            | (Z)-5-Oxohex-2-enedioate                              |
|                 |            | 2-Hydroxymuconate                                     |
|                 |            | 4-Methylene-2-oxoglutarate                            |
| 174.11167570722 | C6H14N4O2  | L-Arginine                                            |
| 180.0647255148  | C7H8N4O2   | Theophylline                                          |
|                 |            | 1,7-Dimethylxanthine                                  |
| 180.0647255148  | C7H8N4O2   | Theobromine                                           |
| 195.05315777165 | C9H9NO4    | Dopaquinone                                           |
|                 |            | 2-Carboxy-2,3-dihydro-5,6-dihydroxyindole             |
| 207.08954328037 | C11H13NO3  | N-Acetyl-D-phenylalanine                              |
|                 |            | N-Acetyl-L-phenylalanine                              |
| 208.0888150044  | C15H12O    | 1-Methoxyphenanthrene                                 |
| 210.12559443594 | C12H18O3   | (-)-Jasmonic acid                                     |
| 218.05790879894 | C12H10O4   | 2,2',3-Trihydroxydiphenylether                        |
| 240.0633881022  | C11H12O6   | 2-Succinyl-6-hydroxy-2,4-cyclohexadiene-1-carboxylate |
| 250.15689456422 | C15H22O3   | Xanthoxin                                             |
|                 |            | Abscisic alcohol                                      |
| 258.01406855781 | C6H11O9P   | D-Glucono-1,5-lactone 6-phosphate                     |
|                 |            | 2-Deoxy-5-keto-D-gluconic acid 6-phosphate            |
|                 |            | 2-Dehydro-3-deoxy-6-phospho-D-gluconate               |
|                 |            | 2-Dehydro-3-deoxy-D-galactonate 6-phosphate           |
| 276.02463324151 | C6H13O10P  | 6-Phospho-D-gluconate                                 |
| 296.23514488492 | C18H32O3   | 13(S)-HODE                                            |
|                 |            | 9(10)-EpOME                                           |
|                 |            | 9(S)-HODE                                             |
|                 |            | 12(13)-EpOME                                          |
| 300.0633881022  | C16H12O6   | 5,7,4'-Trihydroxy-3'-methoxyflavone                   |
|                 |            | Kaempferide                                           |
| 318.03756727718 | C15H10O8   | Myricetin                                             |
| 325.10089580971 | C11H19NO10 | N-Glycoloyl-neuraminate                               |
| 330.0739527859  | C17H14O7   | 3',4',5'-Trihydroxy-3,7-dimethoxyflavone              |
| 344.13186158484 | C12H24O11  | Melibiotol                                            |
| 352.06417594784 | C12H16O12  | 4-(4-Deoxy-alpha-D-gluc-4-enuronosyl)-D-galacturonate |
| 354.0950821533  | C16H18O9   | Chlorogenate                                          |
| 356.11073221744 | C16H20O9   | Scopolin                                              |
| 388.13694696528 | C17H24O10  | Secologanin                                           |

|                 |               |                                    |
|-----------------|---------------|------------------------------------|
| 422.08254204045 | C12H23O14P    | alpha,alpha'-Trehalose 6-phosphate |
|                 |               | Maltose 6'-phosphate               |
|                 |               | Lactose 6-phosphate                |
|                 |               | Sucrose 6-phosphate                |
| 462.07982601198 | C21H18O12     | Luteolin 7-O-glucuronide           |
| 490.12132759089 | C16H23N6O10P  | L-2-Aminoadipate adenylate         |
| 566.05502056976 | C15H24N2O17P2 | UDP-D-galactose                    |
|                 |               | UDP-glucose                        |

(g) White/sessile

| mass            | formula       | name                                |
|-----------------|---------------|-------------------------------------|
| 212.03208797392 | C9H8O6        | 3-(2-Carboxyethyl)-cis,cis-muconate |
|                 |               | 2-Hydroxy-6-keptononatrienedioate   |
| 276.13213636832 | C11H20N2O6    | N6-(L-1,3-Dicarboxypropyl)-L-lysine |
| 278.12665706506 | C14H18N2O4    | alpha-Ribazole                      |
| 280.24023026536 | C18H32O2      | 9-cis,11-trans-Octadecadienoate     |
|                 |               | Linoleate                           |
| 282.0950821533  | C10H17O9R     | sn-3-D-Galactosyl-sn-2-acylglycerol |
| 346.17802393162 | C20H26O5      | Gibberellin A24                     |
| 427.02941495855 | C10H15N5O10P2 | Adenosine 3',5'-bisphosphate        |
|                 |               | dGDP                                |
|                 |               | ADP                                 |

(h) White/pedunculate

| mass            | formula    | name                               |
|-----------------|------------|------------------------------------|
| 161.08406397711 | C10H11NO   | Indole-3-ethanol                   |
| 286.10525291418 | C13H18O7   | Salicin                            |
| 286.10556364417 | C9H20NO7PR | 1-Acyl-sn-glycero-3-phosphocholine |
|                 |            | 2-Acyl-sn-glycero-3-phosphocholine |

(i) Red/sessile

| mass            | formula    | name                           |
|-----------------|------------|--------------------------------|
| 161.08406397711 | C10H11NO   | Indole-3-ethanol               |
| 162.10044231722 | C6H14N2O3  | N6-Hydroxy-L-lysine            |
|                 |            | Procollagen 5-hydroxy-L-lysine |
| 179.05824315209 | C9H9NO3    | Hippurate                      |
| 208.0888150044  | C15H12O    | 1-Methoxyphenanthrene          |
| 265.11230718287 | C12H17N4OS | Thiamin                        |
| 316.20384475664 | C20H28O3   | 15-Deoxy-delta-12,14-PGJ2      |
|                 |            | Gibberellin A12 aldehyde       |
| 338.24570956862 | C20H34O4   | 5,6-DHET                       |
|                 |            | 14,15-DHET                     |
|                 |            | 8,9-DHET                       |
|                 |            | Aphidicolin                    |
|                 |            | 11,12-DHET                     |
| 362.17293855118 | C20H26O6   | Gibberellin A19                |



|  |                 |
|--|-----------------|
|  | Gibberellin A36 |
|--|-----------------|

(j) Red/pedunculate

| mass            | formula                                                                         | name                       |
|-----------------|---------------------------------------------------------------------------------|----------------------------|
| 236.07970687264 | C <sub>11</sub> H <sub>12</sub> N <sub>2</sub> O <sub>4</sub>                   | L-Formylkynurenine         |
| 506.98622981623 | C <sub>10</sub> H <sub>15</sub> N <sub>5</sub> O <sub>13</sub> P <sub>2</sub> S | 3'-Phosphoadenylyl sulfate |

(k) Darney

| mass            | formula                                                                        | name                                                                                                 |
|-----------------|--------------------------------------------------------------------------------|------------------------------------------------------------------------------------------------------|
| 223.04807239121 | C <sub>10</sub> H <sub>9</sub> NO <sub>5</sub>                                 | 4-(2-Amino-5-hydroxyphenyl)-2,4-dioxobutanoate<br>7,8-Dihydro-7,8-dihydroxykynurenate                |
| 256.07355886308 | C <sub>15</sub> H <sub>12</sub> O <sub>4</sub>                                 | 4-(2-Amino-3-hydroxyphenyl)-2,4-dioxobutanoate<br>Liquiritigenin<br>Pinocembrin<br>Isoliquiritigenin |
| 267.09675391905 | C <sub>10</sub> H <sub>13</sub> N <sub>5</sub> O <sub>4</sub>                  | Deoxyguanosine<br>Adenosine                                                                          |
| 282.2558803295  | C <sub>18</sub> H <sub>34</sub> O <sub>2</sub>                                 | (9Z)-Octadecenoic acid                                                                               |
| 320.05321734132 | C <sub>15</sub> H <sub>12</sub> O <sub>8</sub>                                 | Dihydromyricetin                                                                                     |
| 425.04496822237 | C <sub>12</sub> H <sub>19</sub> N <sub>4</sub> O <sub>7</sub> P <sub>2</sub> S | Thiamin diphosphate                                                                                  |

(l) Citeaux

| mass            | formula                                                                        | name                                                                      |
|-----------------|--------------------------------------------------------------------------------|---------------------------------------------------------------------------|
| 172.04840674436 | C <sub>6</sub> H <sub>8</sub> N <sub>2</sub> O <sub>4</sub>                    | Hydantoin-5-propionate                                                    |
| 173.01466408695 | C <sub>6</sub> H <sub>7</sub> NO <sub>3</sub> S                                | 2-Aminobenzenesulfonate                                                   |
| 190.05897142806 | C <sub>6</sub> H <sub>10</sub> N <sub>2</sub> O <sub>5</sub>                   | N-Carbamyl-L-glutamate                                                    |
| 195.05315777165 | C <sub>9</sub> H <sub>9</sub> NO <sub>4</sub>                                  | 2-Carboxy-2,3-dihydro-5,6-dihydroxyindole<br>Dopaquinone                  |
| 212.03208797392 | C <sub>9</sub> H <sub>8</sub> O <sub>6</sub>                                   | 3-(2-Carboxyethenyl)-cis,cis-muconate<br>2-Hydroxy-6-ketononatrienedioate |
| 248.14124450008 | C <sub>15</sub> H <sub>20</sub> O <sub>3</sub>                                 | Abscisic aldehyde                                                         |
| 256.07355886308 | C <sub>15</sub> H <sub>12</sub> O <sub>4</sub>                                 | Liquiritigenin<br>Pinocembrin<br>Isoliquiritigenin                        |
| 320.05321734132 | C <sub>15</sub> H <sub>12</sub> O <sub>8</sub>                                 | Dihydromyricetin                                                          |
| 344.13186158484 | C <sub>12</sub> H <sub>24</sub> O <sub>11</sub>                                | Melibiitol                                                                |
| 425.04496822237 | C <sub>12</sub> H <sub>19</sub> N <sub>4</sub> O <sub>7</sub> P <sub>2</sub> S | Thiamin diphosphate                                                       |

(m) Tronçais

| mass            | formula                                        | name                                           |
|-----------------|------------------------------------------------|------------------------------------------------|
| 163.06332853253 | C <sub>9</sub> H <sub>9</sub> NO <sub>2</sub>  | 3-Methyldioxyindole                            |
| 219.05315777165 | C <sub>11</sub> H <sub>9</sub> NO <sub>4</sub> | 5-Hydroxyindolepyruvate<br>8-Methoxykynurenate |

|                 |               |                                                |
|-----------------|---------------|------------------------------------------------|
| 223.04807239121 | C10H9NO5      | 4-(2-Amino-5-hydroxyphenyl)-2,4-dioxobutanoate |
|                 |               | 7,8-Dihydro-7,8-dihydroxykynurenate            |
|                 |               | 4-(2-Amino-3-hydroxyphenyl)-2,4-dioxobutanoate |
| 256.07355886308 | C15H12O4      | Liquiritigenin                                 |
|                 |               | Pinocembrin                                    |
|                 |               | Isoliquiritigenin                              |
| 267.09675391905 | C10H13N5O4    | Deoxyguanosine                                 |
|                 |               | Adenosine                                      |
| 282.2558803295  | C18H34O2      | (9Z)-Octadecenoic acid                         |
| 289.07976644231 | C11H15NO8     | N-Succinyl-2-L-amino-6-oxoheptanedioate        |
| 320.05321734132 | C15H12O8      | Dihydromyricetin                               |
| 364.18858861532 | C20H28O6      | Gibberellin A37 open lactone                   |
|                 |               | Gibberellin A44 diacid                         |
| 425.04496822237 | C12H19N4O7P2S | Thiamin diphosphate                            |

(n) Bitche

| mass            | formula    | name                                                        |
|-----------------|------------|-------------------------------------------------------------|
| 160.08479225308 | C6H12N2O3  | N-gamma-Acetyldiaminobutyrate                               |
|                 |            | D-Alanyl-D-alanine                                          |
| 163.06332853253 | C9H9NO2    | 3-Methyldioxyindole                                         |
| 174.0640568085  | C6H10N2O4  | N-Formimino-L-glutamate                                     |
| 174.06807955982 | C11H10O2   | 1,2-Dihydroxy-8-methylnaphthalene                           |
| 175.04807239121 | C6H9NO5    | N-Acetyl-L-aspartate                                        |
|                 |            | N-Formyl-L-glutamate                                        |
| 178.1106130781  | C10H14N2O  | (S)-6-Hydroxynicotine                                       |
|                 |            | (R)-6-Hydroxynicotine                                       |
| 179.05824315209 | C9H9NO3    | Hippurate                                                   |
| 202.06299417938 | C12H10O3   | 2,2',3-Trihydroxybiphenyl                                   |
| 219.11067264777 | C9H17NO5   | Pantothenate                                                |
| 252.08987763352 | C15H12N2O2 | Oxcarbazepine                                               |
|                 |            | Carbamazepine-10,11-epoxide                                 |
| 265.11230718287 | C12H17N4OS | Thiamin                                                     |
| 267.09675391905 | C10H13N5O4 | Deoxyguanosine                                              |
|                 |            | Adenosine                                                   |
| 280.1310737392  | C15H20O5   | Phaseic acid                                                |
|                 |            | 8'-Hydroxyabscisate                                         |
| 288.0633881022  | C15H12O6   | Eriodictyol                                                 |
|                 |            | Fustin                                                      |
|                 |            | Dihydrokaempferol                                           |
|                 |            | 2',3,4,4',6'-Pentahydroxychalcone                           |
| 312.23005950448 | C18H32O4   | 9(S)-HPODE                                                  |
|                 |            | (9Z,12Z)-(11S)-11-Hydroperoxyoctadeca-9,12-dienoic acid<... |

|                 |               |                                                             |
|-----------------|---------------|-------------------------------------------------------------|
|                 |               | (9Z,11E)-(13S)-13-Hydroperoxyoctadeca-9,11-dienoic acid<... |
|                 |               | (7S,8S)-DiHODE                                              |
|                 |               | 8(R)-HPODE                                                  |
|                 |               | 9,10-Epoxy-13-hydroxy-11-octadecenoate                      |
|                 |               | 9,10-12,13-Diepoxyoctadecanoate                             |
|                 |               | 12,13-Epoxy-9-hydroxy-10-octadecenoate                      |
| 325.13140809235 | C19H19NO4     | (S)-Cheilanthifoline                                        |
| 330.21949482078 | C21H30O3      | 11beta-Hydroxyprogesterone                                  |
|                 |               | 11alpha-Hydroxyprogesterone                                 |
|                 |               | 17alpha-Hydroxyprogesterone                                 |
|                 |               | 11-Deoxycorticosterone                                      |
| 338.24570956862 | C20H34O4      | 14,15-DHET                                                  |
|                 |               | 8,9-DHET                                                    |
|                 |               | 5,6-DHET                                                    |
|                 |               | Aphidicolin                                                 |
|                 |               | 11,12-DHET                                                  |
| 339.9960491417  | C6H14O12P2    | beta-D-Fructose 2,6-bisphosphate                            |
|                 |               | D-myo-Inositol 3,4-bisphosphate                             |
|                 |               | alpha-D-Glucose 1,6-bisphosphate                            |
|                 |               | beta-D-Fructose 1,6-bisphosphate                            |
|                 |               | 1D-myo-Inositol 1,4-bisphosphate                            |
|                 |               | D-Fructose 1,6-bisphosphate                                 |
|                 |               | D-myo-Inositol 1,3-bisphosphate                             |
|                 |               | D-Tagatose 1,6-bisphosphate                                 |
| 565.07100498705 | C15H25N3O16P2 | CDP-glucose                                                 |

(o) Bertrange

| mass            | formula    | name                                         |
|-----------------|------------|----------------------------------------------|
| 150.01643790978 | C4H6O6     | meso-Tartaric acid                           |
|                 |            | (R,R)-Tartaric acid                          |
| 177.04596421523 | C6H11NO3S  | N-Formyl-L-methionine                        |
| 197.03242232707 | C8H7NO5    | 3-Hydroxy-2-methylpyridine-4,5-dicarboxylate |
| 197.10519334451 | C10H15NO3  | L-Metanephine                                |
| 208.0888150044  | C15H12O    | 1-Methoxyphenanthrene                        |
| 210.06807955982 | C14H10O2   | Phenanthrene-3,4-diol                        |
| 212.08372962396 | C14H12O2   | Pinosylvin                                   |
|                 |            | (+)-cis-3,4-Dihydrophenanthrene-3,4-diol     |
|                 |            | trans-9(S),10(S)-Dihydrodiolphenanthrene     |
| 214.04773803806 | C9H10O6    | 2-Hydroxy-6-oxonona-2,4-diene-1,9-dioate     |
| 226.09535693678 | C10H14N2O4 | Porphobilinogen                              |
| 245.14878949191 | C9H19N5O3  | beta-Alanyl-L-arginine                       |
| 248.11609238136 | C13H16N2O3 | 6-Hydroxymelatonin                           |
| 302.04265265762 | C15H10O7   | Tricetin                                     |
|                 |            | Quercetin                                    |

|                 |               |                                                       |
|-----------------|---------------|-------------------------------------------------------|
| 352.06417594784 | C12H16O12     | 4-(4-Deoxy-alpha-D-gluc-4-enuronosyl)-D-galacturonate |
| 547.06044030335 | C15H23N3O15P2 | CDP-4-dehydro-6-deoxy-D-glucose                       |

(p) Jupilles

| mass            | formula       | name                                     |
|-----------------|---------------|------------------------------------------|
| 197.10519334451 | C10H15NO3     | L-Metanephrine                           |
| 210.06807955982 | C14H10O2      | Phenanthrene-3,4-diol                    |
| 214.04773803806 | C9H10O6       | 2-Hydroxy-6-oxonona-2,4-diene-1,9-dioate |
| 245.14878949191 | C9H19N5O3     | beta-Alanyl-L-arginine                   |
| 248.11609238136 | C13H16N2O3    | 6-Hydroxymelatonin                       |
| 302.04265265762 | C15H10O7      | Quercetin                                |
|                 |               | Tricetin                                 |
| 547.06044030335 | C15H23N3O15P2 | CDP-4-dehydro-6-deoxy-D-glucose          |

(q) Saint-Palais

| mass            | formula       | name                                                        |
|-----------------|---------------|-------------------------------------------------------------|
| 177.04596421523 | C6H11NO3S     | N-Formyl-L-methionine                                       |
| 180.07864424352 | C10H12O3      | Coniferyl alcohol                                           |
| 192.07864424352 | C11H12O3      | cis-1,2-Dihydroxy-1,2-dihydro-7-hydroxymethylnaphthalene... |
| 197.03242232707 | C8H7NO5       | 3-Hydroxy-2-methylpyridine-4,5-dicarboxylate                |
| 197.10519334451 | C10H15NO3     | L-Metanephrine                                              |
| 208.0888150044  | C15H12O       | 1-Methoxyphenanthrene                                       |
| 210.06807955982 | C14H10O2      | Phenanthrene-3,4-diol                                       |
| 212.08372962396 | C14H12O2      | Pinosylvin                                                  |
|                 |               | (+)-cis-3,4-Dihydrophenanthrene-3,4-diol                    |
|                 |               | trans-9(S),10(S)-Dihydrodiolphenanthrene                    |
| 214.04773803806 | C9H10O6       | 2-Hydroxy-6-oxonona-2,4-diene-1,9-dioate                    |
| 226.09535693678 | C10H14N2O4    | Porphobilinogen                                             |
| 248.11609238136 | C13H16N2O3    | 6-Hydroxymelatonin                                          |
| 250.04773803806 | C12H10O6      | 2-Hydroxy-6-oxo-6-(2-hydroxyphenoxy)-hexa-2,4-dienoate      |
| 302.04265265762 | C15H10O7      | Tricetin                                                    |
|                 |               | Quercetin                                                   |
| 352.06417594784 | C12H16O12     | 4-(4-Deoxy-alpha-D-gluc-4-enuronosyl)-D-galacturonate       |
| 434.12129690114 | C21H22O10     | Naringenin 7-O-beta-D-glucoside                             |
| 547.06044030335 | C15H23N3O15P2 | CDP-4-dehydro-6-deoxy-D-glucose                             |

(r) Sud-Ouest

| mass            | formula       | name                                     |
|-----------------|---------------|------------------------------------------|
| 214.04773803806 | C9H10O6       | 2-Hydroxy-6-oxonona-2,4-diene-1,9-dioate |
| 547.06044030335 | C15H23N3O15P2 | CDP-4-dehydro-6-deoxy-D-glucose          |

(s) Limousin

| <b>mass</b>     | <b>formula</b> | <b>name</b>                               |
|-----------------|----------------|-------------------------------------------|
| 180.0647255148  | C7H8N4O2       | Theophylline                              |
|                 |                | 1,7-Dimethylxanthine                      |
|                 |                | Theobromine                               |
| 195.05315777165 | C9H9NO4        | 2-Carboxy-2,3-dihydro-5,6-dihydroxyindole |
|                 |                | Dopaquinone                               |
| 245.14878949191 | C9H19N5O3      | beta-Alanyl-L-arginine                    |
| 248.14124450008 | C15H20O3       | Abscisic aldehyde                         |
| 278.12665706506 | C14H18N2O4     | alpha-Ribazole                            |
| 355.15523462397 | C14H23N6O3S    | S-Adenosylmethioninamine                  |
